# Supplementary material for: iEnhancer-DCSA: identifying enhancers via dual-scale convolution and spatial attention
Source: PubMed Central journal article supplement (PMC10339552; doi:10.1186/s12864-023-09468-1), 2023-07-13
Supplement: 12864_2023_9468_MOESM1_ESM.pdf [file 12864_2023_9468_MOESM1_ESM.pdf]

## Supplementary Information

Supplementary Table S1. Independent test identifying enhancers and their strength under 5 trials. Supplementary Table S2. Performance comparison of dual-scale fusion using different combinations of filters on the benchmark dataset.

**Table S1 Independent test identifying enhancers and their strength under 5 trials.**

| Layer        | No. of Trials | ACC(%) | MCC    | SN(%) | SP(%) | AUC(%) |
|--------------|---------------|--------|--------|-------|-------|--------|
| First layer  | 1             | 83.00  | 0.661  | 80.00 | 86.00 | 86.38  |
|              | 2             | 82.25  | 0.647  | 78.50 | 86.00 | 86.15  |
|              | 3             | 81.75  | 0.636  | 79.50 | 84.00 | 86.19  |
|              | 4             | 82.50  | 0.652  | 78.50 | 86.50 | 86.09  |
|              | 5             | 81.50  | 0.631  | 79.00 | 84.00 | 85.85  |
|              | <b>Mean</b>   | 82.20  | 0.645  | 79.10 | 85.30 | 86.13  |
|              | <b>Var</b>    | 0.285  | 0.0001 | 0.340 | 1.160 | 0.029  |
| Second layer | 1             | 92.00  | 0.848  | 99.00 | 85.00 | 97.56  |
|              | 2             | 90.00  | 0.810  | 98.00 | 82.00 | 96.43  |
|              | 3             | 89.50  | 0.805  | 99.00 | 80.00 | 96.17  |
|              | 4             | 91.50  | 0.839  | 99.00 | 84.00 | 97.47  |
|              | 5             | 89.50  | 0.802  | 98.00 | 81.00 | 96.24  |
|              | <b>Mean</b>   | 90.50  | 0.821  | 98.60 | 82.40 | 96.77  |
|              | <b>Var</b>    | 1.100  | 0.0004 | 0.240 | 3.440 | 0.374  |

**Table S2 Performance comparison of dual-scale fusion using different combinations of filters on the benchmark dataset.**

| Dataset          | Combine          | ACC(%)       | MCC          | SN(%)        | SP(%)        | AUC(%)       |
|------------------|------------------|--------------|--------------|--------------|--------------|--------------|
| Cross-validation | First layer      |              |              |              |              |              |
|                  | (8, 10)          | 78.64        | 0.573        | 73.91        | 82.93        | 84.75        |
|                  | (8, 12)          | <b>79.01</b> | 0.578        | <b>75.43</b> | 81.88        | 84.78        |
|                  | (10, 12)         | 78.94        | <b>0.580</b> | 72.84        | <b>84.23</b> | <b>84.97</b> |
|                  | Second layer     |              |              |              |              |              |
|                  | (8, 10)          | 66.91        | 0.336        | 70.96        | <b>62.35</b> | <b>68.94</b> |
|                  | (8, 12)          | <b>66.98</b> | 0.338        | 71.95        | 61.37        | 68.83        |
|                  | (10, 12)         | 66.91        | <b>0.344</b> | <b>72.58</b> | 61.00        | 68.72        |
|                  | Independent test | First layer  |              |              |              |              |
| (8, 10)          |                  | 80.75        | 0.616        | 77.50        | 84.00        | 84.63        |
| (8, 12)          |                  | 82.25        | 0.646        | <b>80.00</b> | 84.50        | 85.33        |
| (10, 12)         |                  | <b>82.50</b> | <b>0.651</b> | 79.50        | <b>85.50</b> | <b>85.58</b> |
| Second layer     |                  |              |              |              |              |              |
| (8, 10)          |                  | 88.00        | 0.776        | <b>98.00</b> | 78.00        | 93.63        |
| (8, 12)          |                  | 90.50        | 0.817        | 97.00        | 84.00        | 95.12        |
| (10, 12)         |                  | <b>91.50</b> | <b>0.837</b> | <b>98.00</b> | <b>85.00</b> | <b>96.60</b> |

Note:  $(n_1, n_2)$  denotes using a filter size of  $n_1$  and  $n_2$  to perform dual-scale fusion.
